# Supplementary material for: A reaction-based scenario for fluorescence probing of Au(iii) ions in human cells and plants
Source: Royal Society of Chemistry journal article supplement (doi:10.1039/d3ob01081c), 2023-01-01
Supplement: d3ob01081c1.pdf [file d3ob01081c1.pdf]

## Supporting Information

# A reaction-based scenario for fluorescent probing of Au(III) ions in human cells and plants

## Table of Contents

|                                   |    |
|-----------------------------------|----|
| 1. Experimental .....             | 2  |
| 2. Analytical Studies.....        | 3  |
| 3. Photostability Studies .....   | 6  |
| 4. Electrochemical Studies .....  | 8  |
| 5. References.....                | 8  |
| 6. Proposed Mechanism .....       | 9  |
| 7. NMR Spectra of Compounds ..... | 10 |
| 8. HRMS of Compounds .....        | 14 |

## 1. EXPERIMENTAL

All chemicals were purchased from commercial suppliers. NMR spectra were measured on Varian VNMRJ 400 Nuclear Magnetic Resonance Spectrometer. All spectroscopic were collected on a Horiba-Duetta, the two-in-one

fluorescence and absorbance spectrometer. The samples were measured in a quartz cuvette with a path length of 10.0 mm and a volume of 2.0 mL. Fluorescence imaging was performed with Zeiss Axio Observer inverted fluorescence microscope. pH was recorded by HI-8014 instrument (HANNA). Mass spectra were recorded on Agilent 6530 Accurate-Mass QTOF LC/MS. All measurements were conducted at least in triplicate. All experiments were performed under argon atmosphere.

### Synthesis of KEREM-1

To a mixture of BOD-AC (140 mg, 0.4 mmol) and 2-iodoprop-2-en-1-ol (147 mg, 0.8 mmol) in THF (20 mL) were added  $\text{PdCl}_2(\text{PPh}_3)_2$  (29 mg, 0.1 equiv.), CuI (15 mg, 0.2 equiv.) and diisopropylamine (11.6 mL). The reaction mixture was stirred overnight at 50 °C. After completion of the reaction as monitored by TLC, the solvent was evaporated and the resulting residue was extracted with water and  $\text{CH}_2\text{Cl}_2$  (3 x 30 mL). The organic layer was dried over  $\text{MgSO}_4$ , filtered and concentrated. The resultant residue was purified by column chromatography with hexane: ethyl acetate (2:1) to afford **KEREM-1** as red solid (98 mg, 70 % yield).  $^1\text{H}$  NMR (400 MHz,  $\text{CDCl}_3$ )  $\delta$ = 7.51 – 7.48 (m, 3H), 7.28 – 7.25 (m, 2H), 6.03 (s, 1H), 5.52 (dd,  $J$ =2.7, 1.3 Hz, 1H), 5.48 (dd,  $J$  = 2.7, 1.3 Hz, 1H), 4.19 (s, 2H), 2.63 (s, 3H), 2.57 (s, 3H), 1.43 (s, 3H), 1.39 (s, 3H).  $^{13}\text{C}$  NMR (100 MHz,  $\text{CDCl}_3$ )  $\delta$ = 158.1, 156.39, 145.07, 142.87, 142.3, 134.74, 132.70, 131.51, 130.28, 129.4, 129.35, 127.97, 122.36, 119.45, 114.70, 93.51, 83.83, 65.64, 32.08, 29.85, 14.70, 13.27. HRMS:  $m/z$ : Calcd. for  $(\text{C}_{24}\text{H}_{23}\text{BF}_2\text{N}_2\text{O})$   $[\text{M}+\text{H}]^+$ : 405.1950; found 405.1951.

### Synthesis of BOD-FUR

$\text{AuCl}_3$  (30 mg, 0.1 mmol) was added to **KEREM-1** (40 mg, 0.1 mmol) in PBS/EtOH (10 mL, (7/3 (v/v))). The reaction mixture was stirred for 2 hours at room temperature. The resulting solution was extracted with  $\text{CH}_2\text{Cl}_2$  (3x10mL) and dried over  $\text{MgSO}_4$ . After evaporation of solvent, the resultant residue was purified by column chromatography. (20 mg, 50% yield).  $^1\text{H}$  NMR (400 MHz,  $\text{CDCl}_3$ )  $\delta$ = 7.50 – 7.48 (m, 3H), 7.31 – 7.29 (m, 2H), 7.21 – 7.19 (m, 1H), 6.09 (s, 1H), 6.01 (s, 1H), 2.68 (s, 3H), 2.57 (s, 3H), 2.05 (d,  $J$  = 1.1 Hz, 3H), 1.43 (s, 3H), 1.38 (s, 3H).  $^{13}\text{C}$  NMR (100 MHz,  $\text{CDCl}_3$ )  $\delta$ = 156.50, 154.36, 148.25, 143.92, 142.19, 139.02, 138.58, 135.17, 132.08, 130.95, 129.33, 129.19, 128.16, 123.4, 121.85, 121.22, 111.60, 29.85, 14.65, 14.03, 13.02, 9.95. HRMS:  $m/z$ : Calcd. for  $(\text{C}_{24}\text{H}_{23}\text{BF}_2\text{N}_2\text{O})$   $[\text{M}+\text{H}]^+$ : 405.1950; found 405.1962.

## 2. ANALYTICAL STUDIES

Fluorescence quantum yield was calculated with the following equation;

$$\Phi_{\text{F(X)}} = \Phi_{\text{F(S)}} (A_{\text{S}}F_{\text{X}}/A_{\text{X}}F_{\text{S}}) (n_{\text{X}}/n_{\text{S}})^2$$

Rhodamine 6G,  $\Phi_F=0.95$  in ethanol, was used as the standard.<sup>1</sup>

A: absorbance at the excitation wavelength,

$\Phi_F$ : fluorescence quantum yield,

F: area under the corrected emission curve

n: refractive index of the solvents.

S and X refer to the standard and the unknown, respectively. ( $\Phi_{F(KEREM-1)} = 0.122$ ,  $\Phi_{F(BOD-FUR)}=0.703$ )

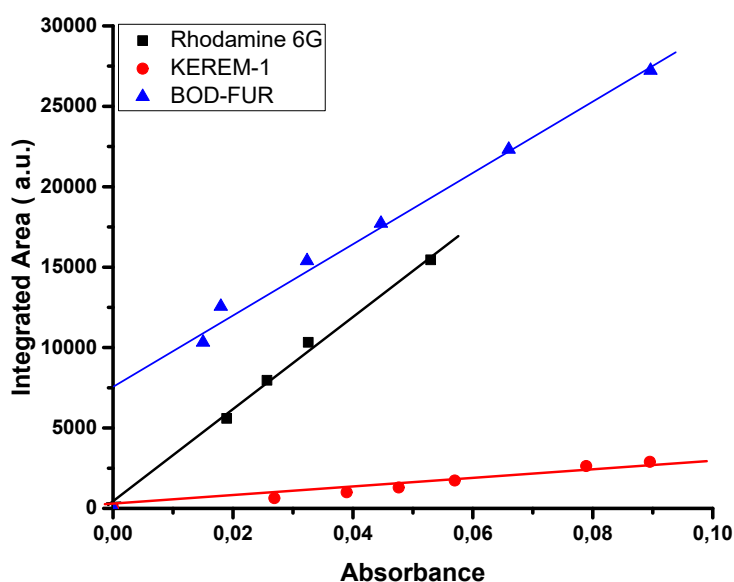

**Fig. S1** Quantum yield plot, Relative fluorescence intensities using Rhodamine 6G as the standard.

Detection limit was calculated from the following formula;

$$\text{Detection limit} = 3\sigma_{bi}/m,$$

$\sigma_{bi}$ : standard deviation of blank measurements,

m: slope between intensity versus sample concentration.

The fluorescence changes of 10 examples of **KEREM-1** (10.0  $\mu\text{M}$ ) were measured to determine the standart deviation of the blanks.<sup>2</sup> A good linear relationship between the fluorescence intensity and  $\text{Au}^{3+}$  concentration was obtained over the range of 0.1 – 0.9  $\mu\text{M}$  ( $R^2= 0.9964$ ). The detection limit was calculated as 358 nM. All measurements were performed in triplicates.

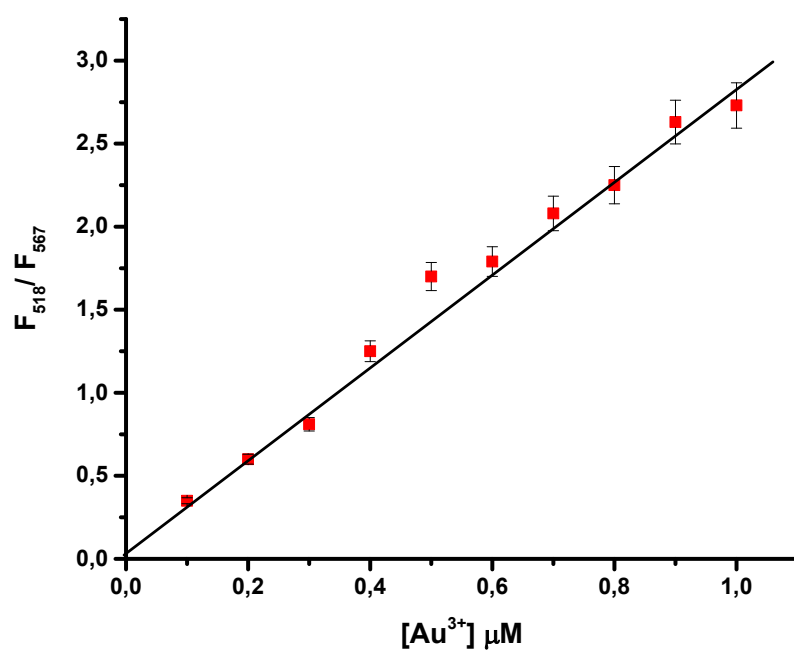

**Fig. S2** Fluorescence titration of **KEREM-1** (10.0  $\mu\text{M}$ ) with  $\text{Au}^{3+}$  (0.1- 0.9  $\mu\text{M}$ ), in PBS (0.01 M) /EtOH (pH 7.0, v/v,7:3). ( $\lambda_{\text{ex}}$ :460 nm, emission wavelengths:  $F_{518}/F_{567}$  at 25  $^{\circ}\text{C}$ ).

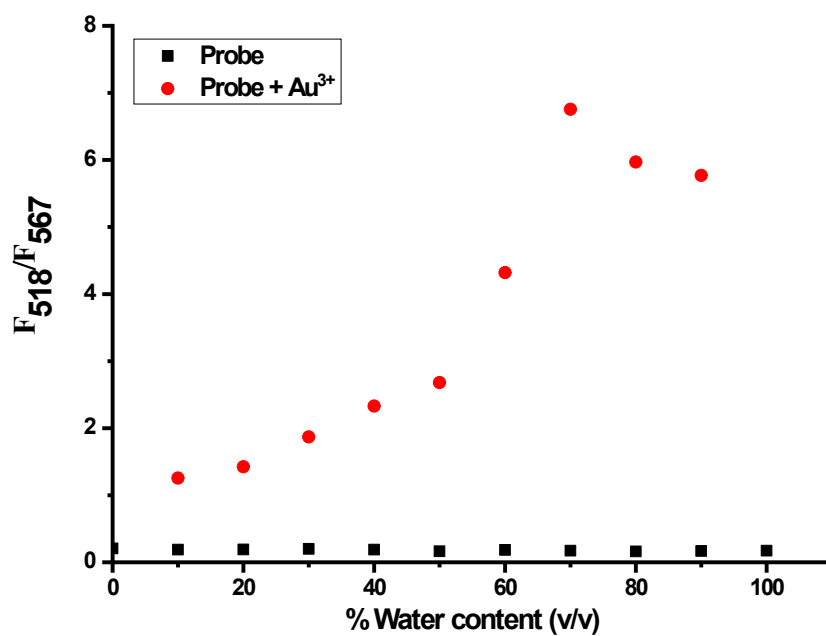

**Fig. S3** The effect of water content on the response of **KEREM-1** (10  $\mu\text{M}$ ) toward  $\text{Au}^{3+}$  (100 $\mu\text{M}$ , 10 Equiv.) in PBS (0.01 M) /EtOH (pH 7.0, v/v,7:3). ( $\lambda_{\text{ex}}$ : 460 nm, emission:  $F_{518}/F_{567}$  at 25  $^{\circ}\text{C}$ ).

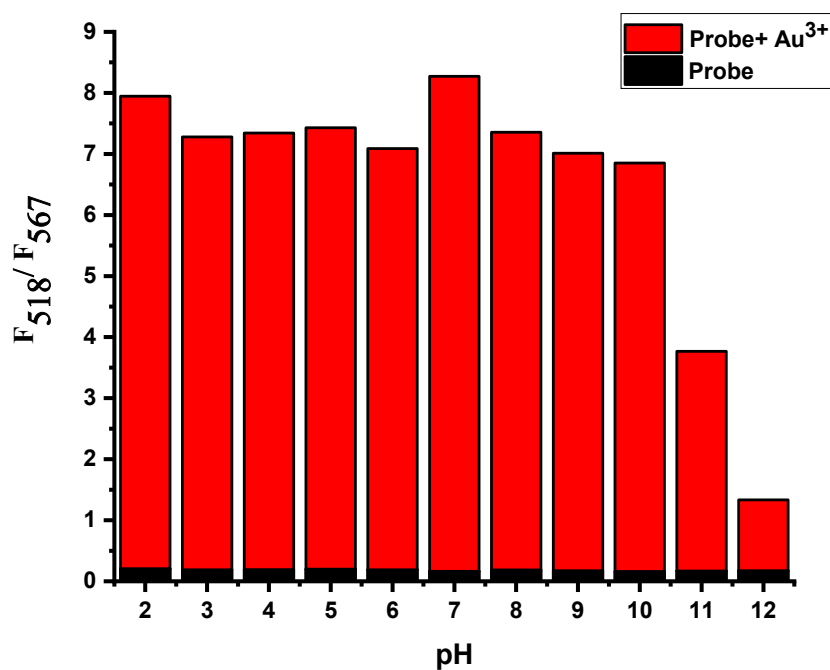

**Fig. S4** pH effect on the response of **KEREM-1** (10  $\mu$ M) toward  $\text{Au}^{3+}$  (100  $\mu$ M, 10 Equiv.) in PBS (0.01 M) /EtOH) (pH 7.0, v/v,7:3). ( $\lambda_{\text{ex}}$ : 460 nm, emission:  $F_{518}/F_{567}$  at 25 °C).

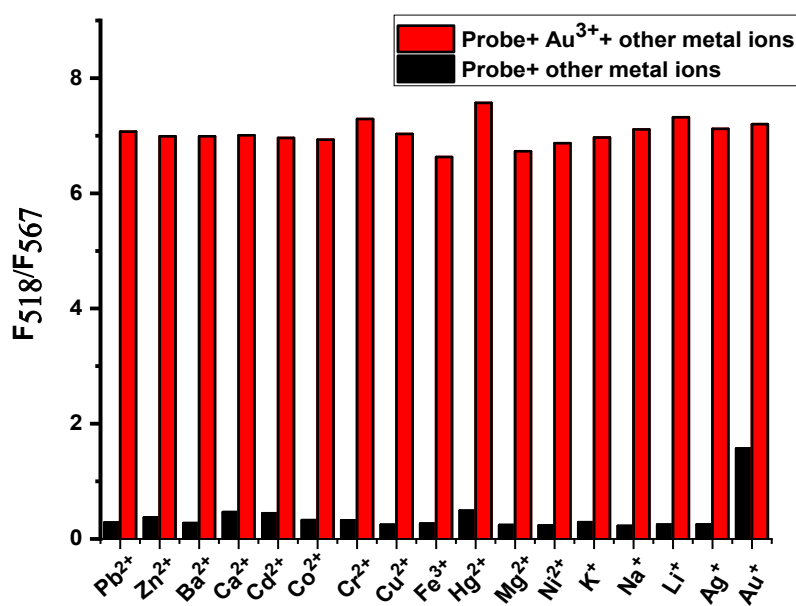

**Fig. S5** Bar graph notation of fluorescence intensities of **KEREM-1** (10  $\mu$ M) with  $\text{Au}^{3+}$  (100  $\mu$ M, 10 Equiv.) and 20 equiv. of other metal ions in PBS (0.01 M) /EtOH) (pH 7.0, v/v, 7:3) ( $\lambda_{\text{ex}}$ : 460 nm, emission:  $F_{518}/F_{567}$  at 25 °C).

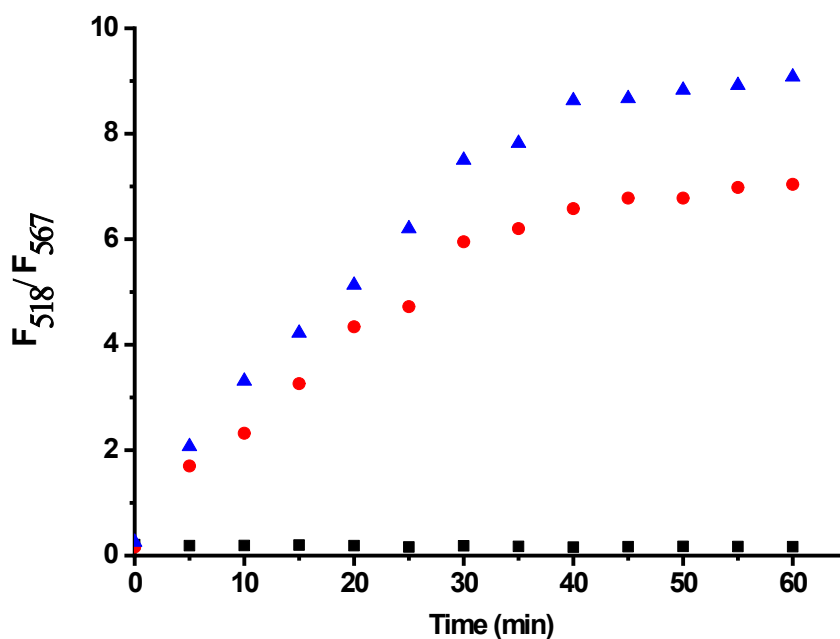

**Fig. S6** Reaction time profiles of **KEREM-1** (10  $\mu\text{M}$ ) in the absence (■) and presence of  $\text{Au}^{3+}$  [10 (●), 30(▲)  $\mu\text{M}$ ]. The fluorescence intensities at 518 nm and 567 nm were continuously monitored at time intervals in 0.01 M PBS buffer/EtOH (pH 7.0, v/v, 7:3) ( $\lambda_{\text{ex}}$ : 460 nm, emission wavelengths:  $F_{518}/F_{567}$  at 25  $^{\circ}\text{C}$ ).

### 3. PHOTOSTABILITY STUDIES

The photostability of the **KEREM-1** was investigated in 0.01 M PBS buffer-ethanol (7:3) system. Sample was placed in 10x10 mm quartz cuvette and it was positioned 15 cm away from the light source (green led, 500-570 nm). Incident radiation intensity was calculated as 3.3 mW/cm<sup>2</sup>. Absorbance measurements were performed for a period of 9 hours at 1 hour time intervals and degradation rate was calculated from the equation below:

$$\ln(A_t/A_0) = k_{\text{deg}} \times t$$

where;  $A_t$  is absorbance at the irradiation time,  $A_0$  is absorbance at  $t=0$ ,  $t$  is time.

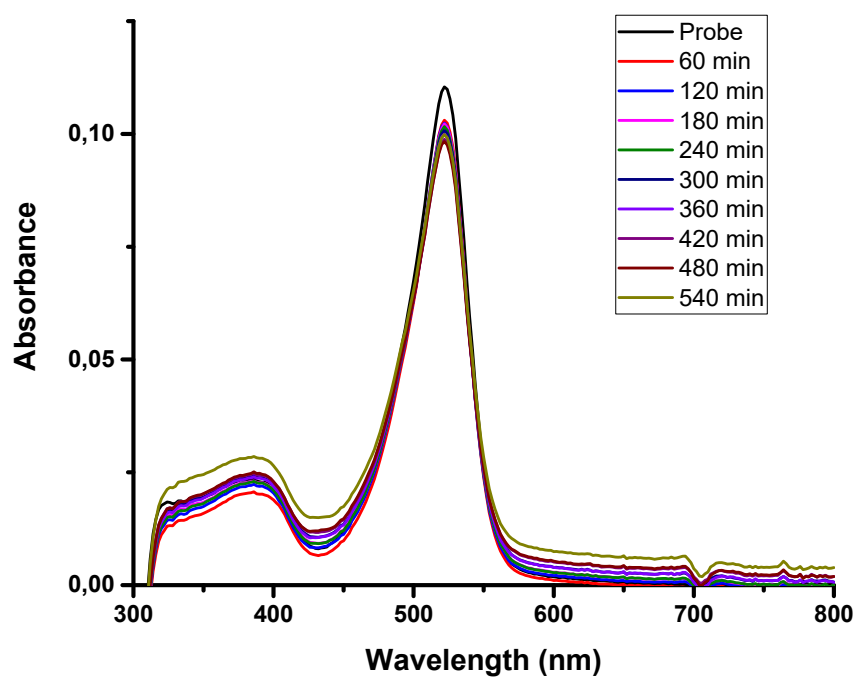

Fig. S7 Absorbance changes of KEREM-1 by irradiation with green led.

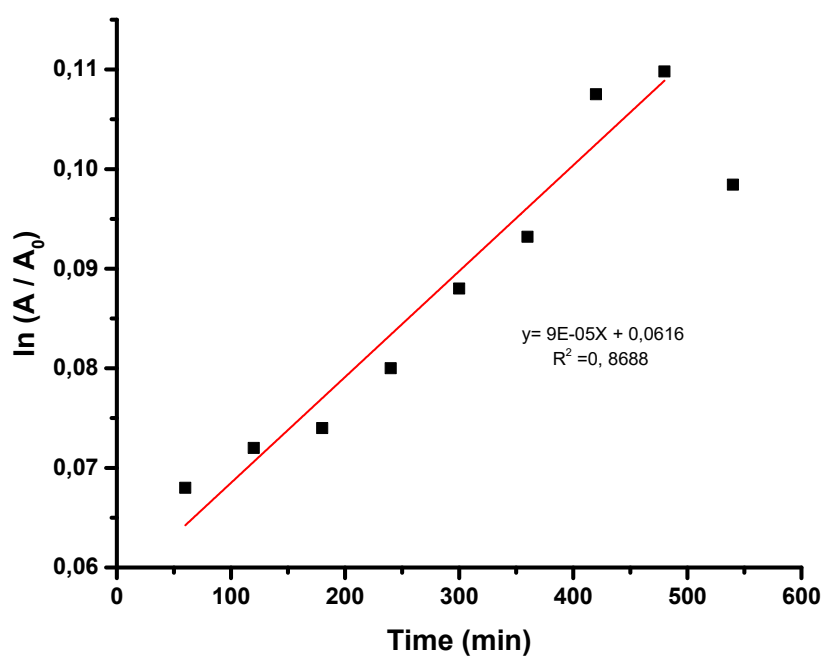

Fig. S8  $\ln(A_t/A_0)$ /time graphic of KEREM-1.

## 4. ELECTROCHEMICAL STUDIES

Electrochemical studies of **KEREM-1** and **BOD-FUR** were carried out by using a CH Potentiostat and glassy carbon as working electrode, platinum wire as counter electrode, Ag wire as reference electrode and ferrocene as internal standard in 0.1 M acetonitrile solution of tetrabutylammoniumhexafluorophosphate (TBAPF<sub>6</sub>) electrolyte system. Scan rate of 200 mV/s was applied, and all the solutions were deoxygenated with nitrogen gas bubbling. Highest occupied molecular orbital (HOMO) energy level and lowest unoccupied molecular orbital (LUMO) energy level of **KEREM-1** and **BOD-FUR** were calculated by using the following equations:<sup>3,4</sup>

$$E_{\text{LUMO}} = -e(E_{1/2(\text{red., dye})} - E_{1/2(\text{Fc/Fc}^+)} + 4.8)$$

$$E_{\text{HOMO}} = -e(E_{1/2(\text{ox., dye})} - E_{1/2(\text{Fc/Fc}^+)} + 4.8)$$

where,  $E_{1/2(\text{Fc/Fc}^+)}$  is 0.41V.

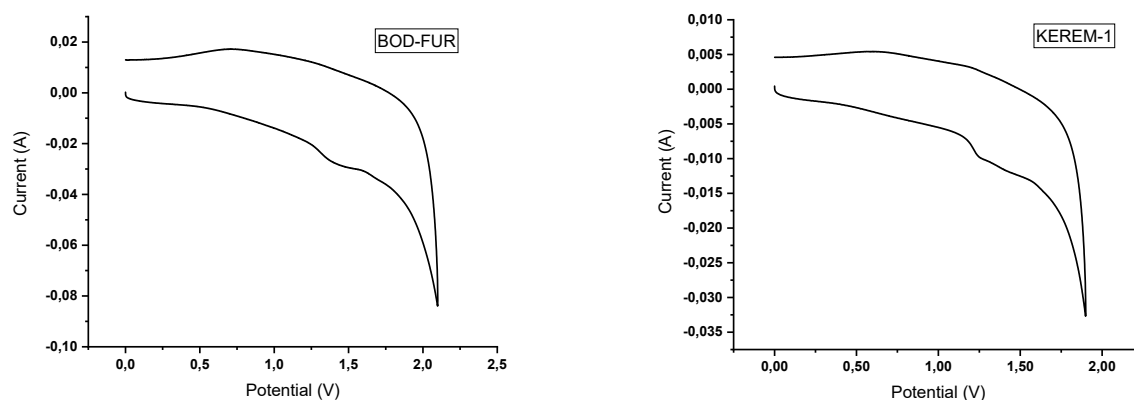

**Fig. S9** Cyclic Voltammograms for **KEREM-1** and **BOD-FUR**. (Reported redox potentials of the compounds were the arithmetic mean of the forward and reverse redox onset potentials.)

## 5. REFERENCES

- (1) A. M. Brouwer, *Pure Appl. Chem.*, 2011, **83**, 2213-2228.
- (2) M. Üçüncü, E. Karakuş, M. Emrullahoğlu, *Chem. Commun.*, 2016, **52**, 8247-8250.
- (3) D. O. Cowan, R. L. E. Drisko, *J. Am. Chem. Soc.* 1970, **92**, 21, 6281–6285.
- (4) M. Kus, Ö. Haklı, C. Zafer, C. Varlikli, S. Demic, S. Özçelik, S. İcli, *Organic Electronics*, 2008, **9**, 757-766.

## 6. PROPOSED MECHANISM

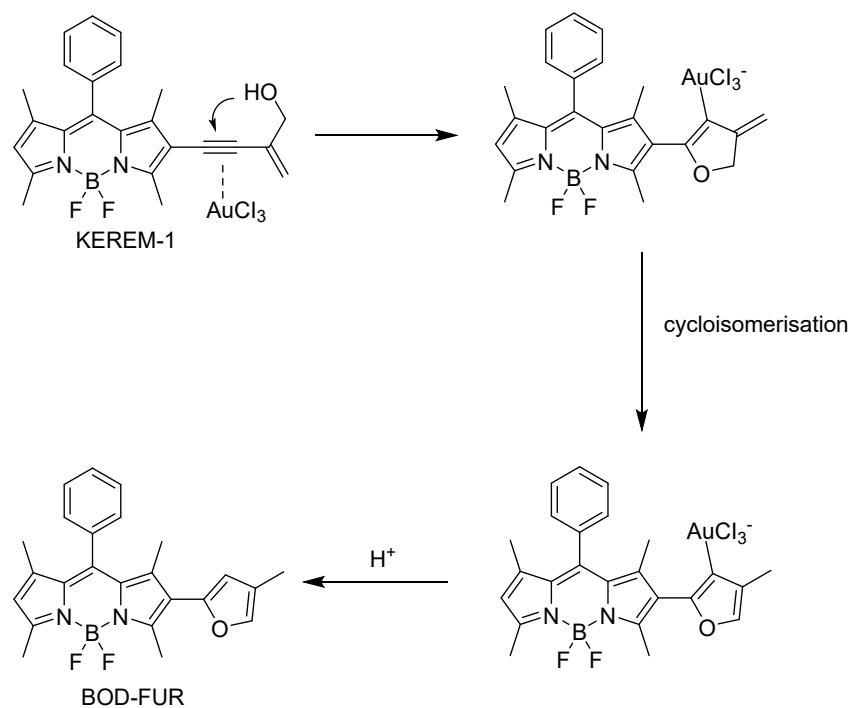

**Fig. S7** Mechanism for gold ion catalyzed intramolecular cyclisation.

## 7. NMR SPECTRA OF COMPOUNDS

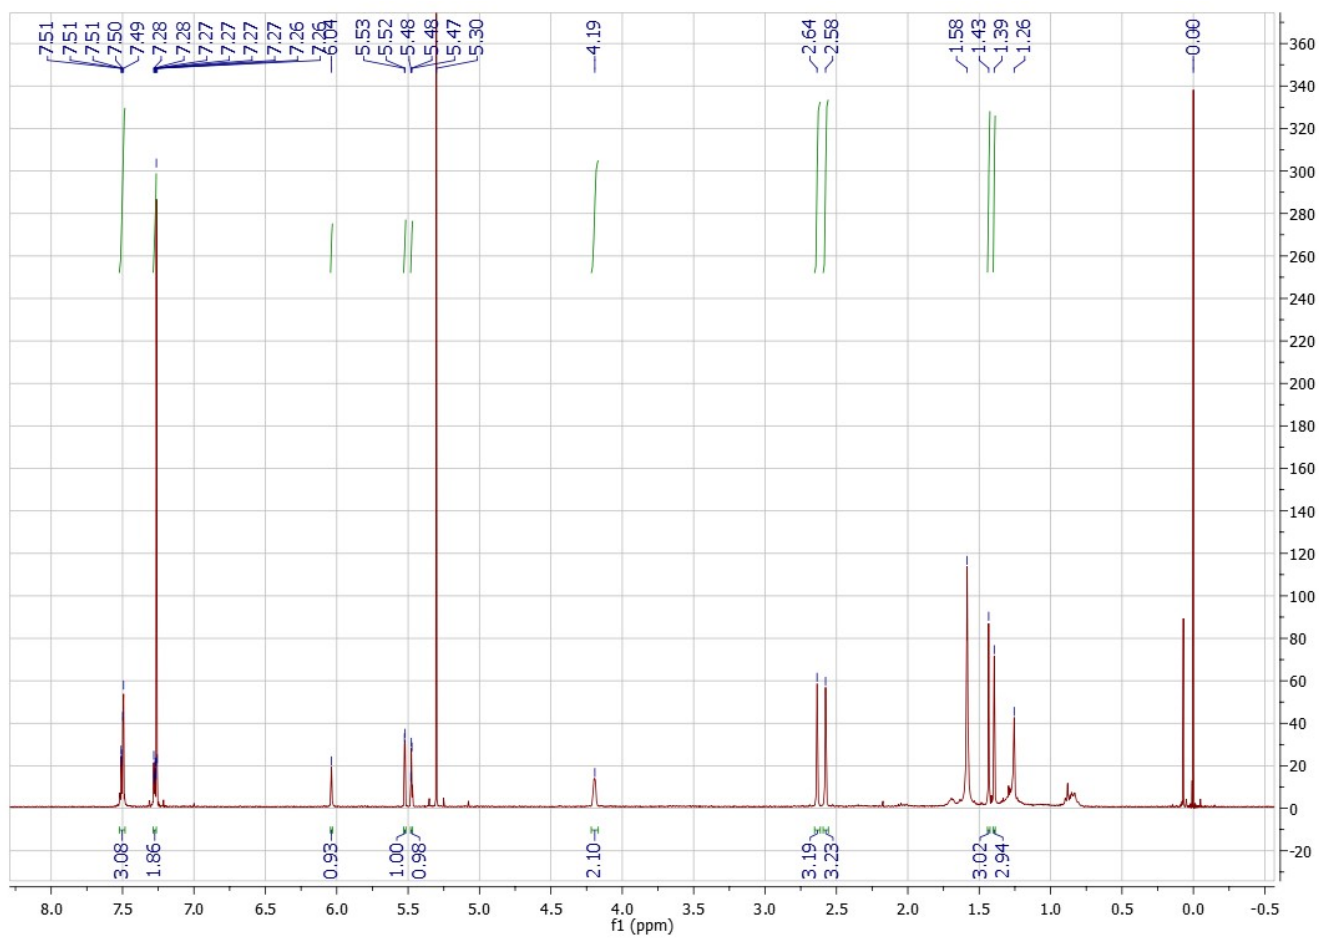

Fig. S8  $^1\text{H}$  NMR of KEREM-1

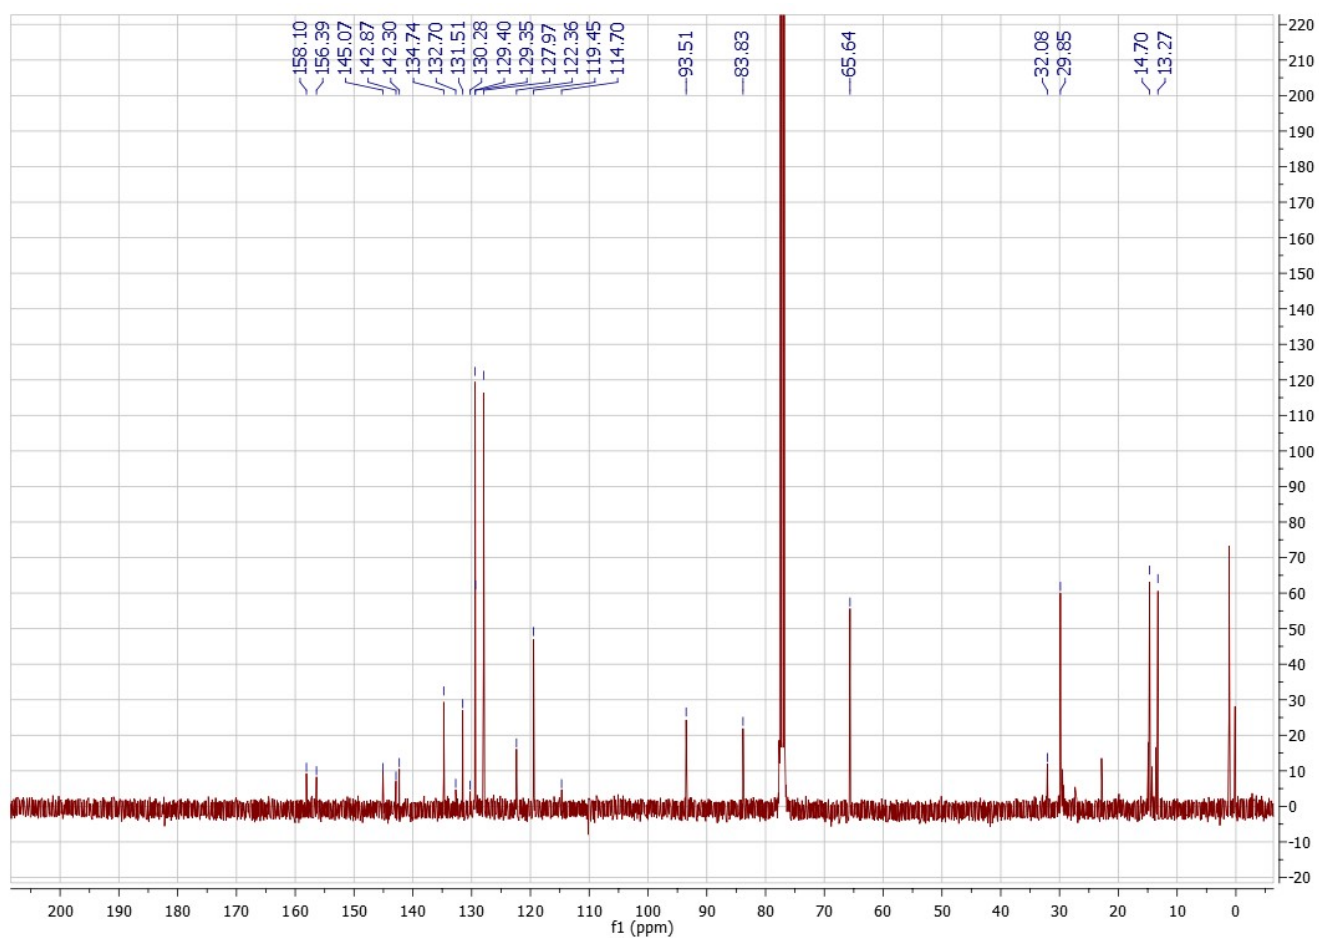

Fig. S9  $^{13}\text{C}$  NMR of KEREM-1

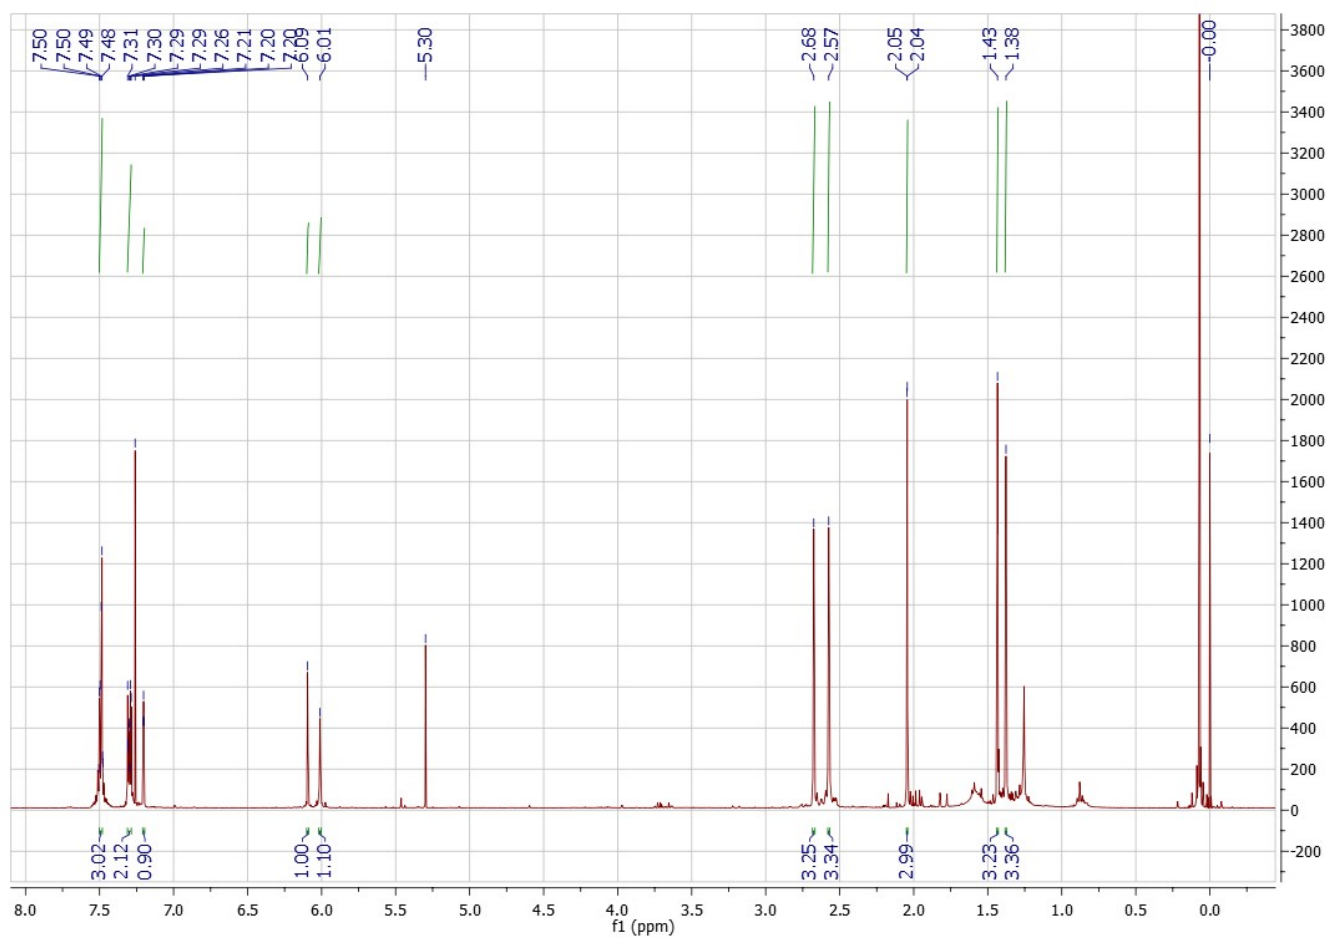

**Fig. S10**  $^1\text{H}$  NMR of BOD-FUR

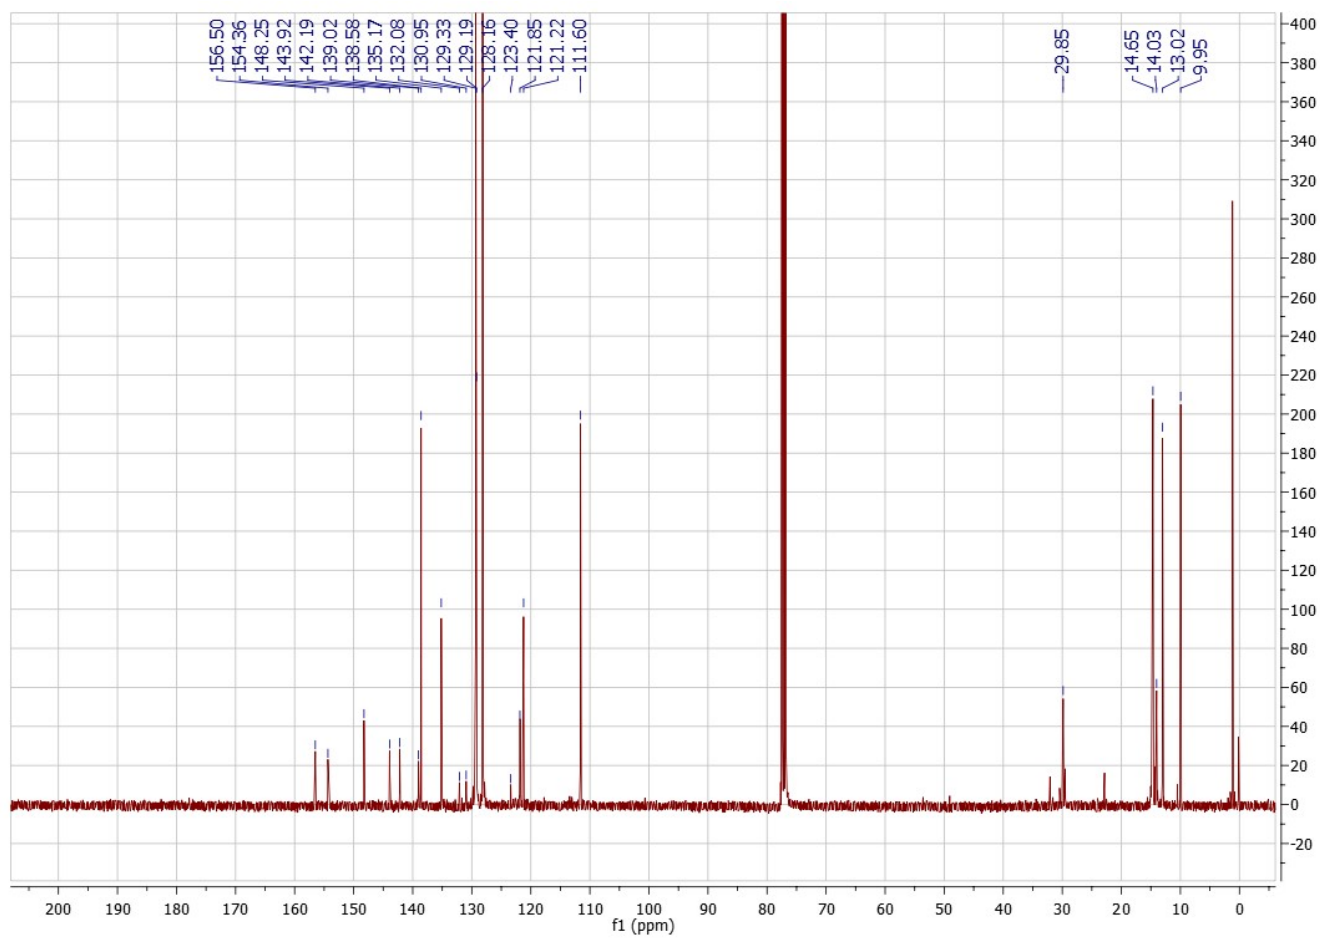

**Fig. S11**  $^{13}\text{C}$  NMR of BOD-FUR

## 8. HRMS of COMPOUNDS

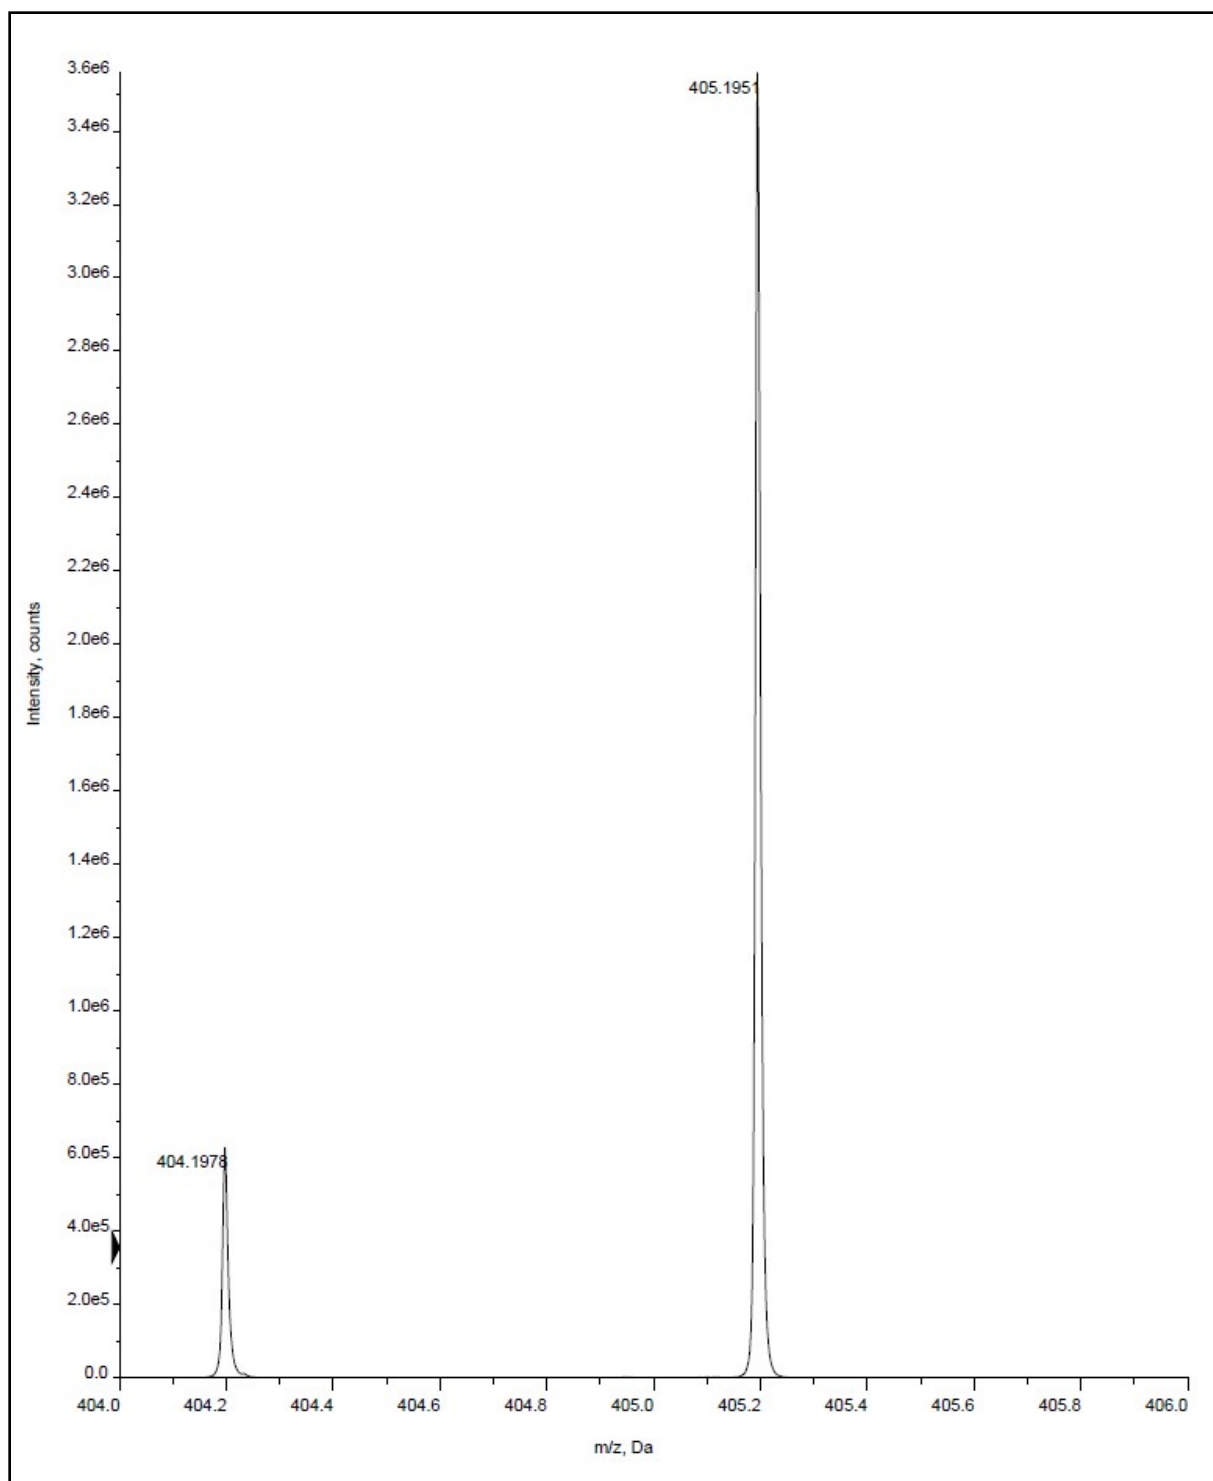

**Fig. S12** HRMS of KEREM-1

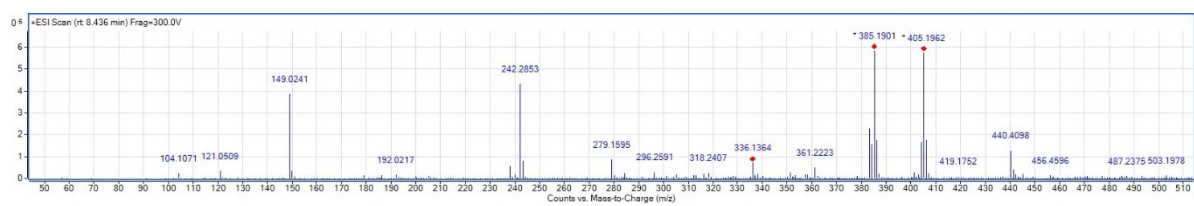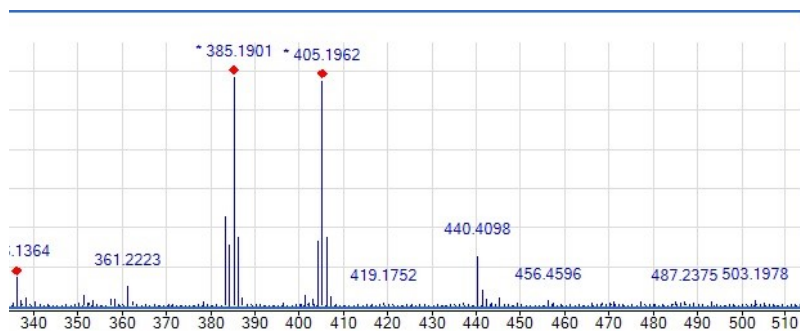

**Fig. S13** HRMS of BOD-FUR
